# Supplementary material for: Control of self-aggregation of fullerenes by connection with calix[4]arene: solvent- and guest-effects to particle size
Source: Royal Society of Chemistry journal article supplement (doi:10.1039/b513123e), 2005-12-19
Supplement: b513123e.pdf [file b513123e.pdf]

## **Electronic Supplementary Information for**

### **Control of Self-Aggregation of Fullerenes by Connection with Calix[4]arene: Solvent- and Guest-Effects to Particle Size**

**Atsushi Ikeda,<sup>\*a</sup> Taishin Irida,<sup>a</sup> Tomoe Hamano,<sup>a</sup> Toyokazu Kitahashi,<sup>a</sup> Yoshihiro Sasaki,<sup>a</sup>  
Mineo Hashizume,<sup>a</sup> Jun-ichi Kikuchi,<sup>a</sup> Toshifumi Konishi<sup>b</sup> and Seiji Shinkai<sup>c</sup>**

<sup>a</sup> *Graduate School of Materials Science, Nara Institute of Science and Technology, Takayama, Ikoma, Nara 630-0192, Japan. Fax: 81-743-72-6099; Tel: 81-743-72-6091; E-mail: aikeda@ms.naist.jp*

<sup>b</sup> *RIKEN (The Institute of Physical and Chemical Research), 2-1 Hirosawa, Wako, Saitama 351-0198, Japan.*

<sup>c</sup> *Department of Chemistry & Biochemistry, Graduate School of Engineering, Kyushu University, Fukuoka 812-8581, Japan.*

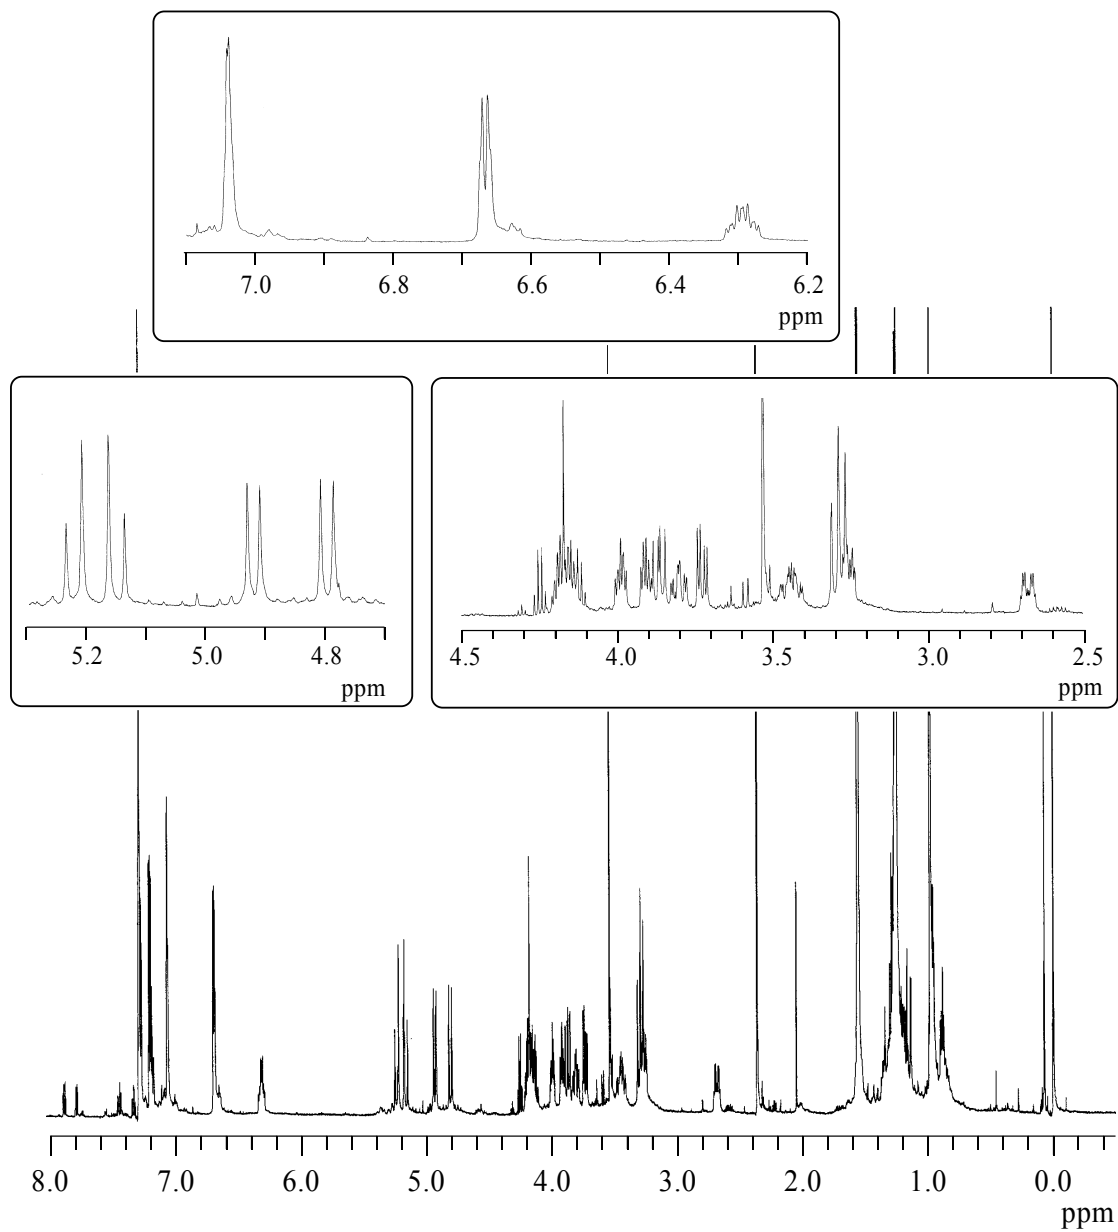

**Fig. S1**  $^1\text{H}$  NMR spectrum at 600 MHz in  $\text{CDCl}_3$  at  $25^\circ\text{C}$  of *rac*-1.

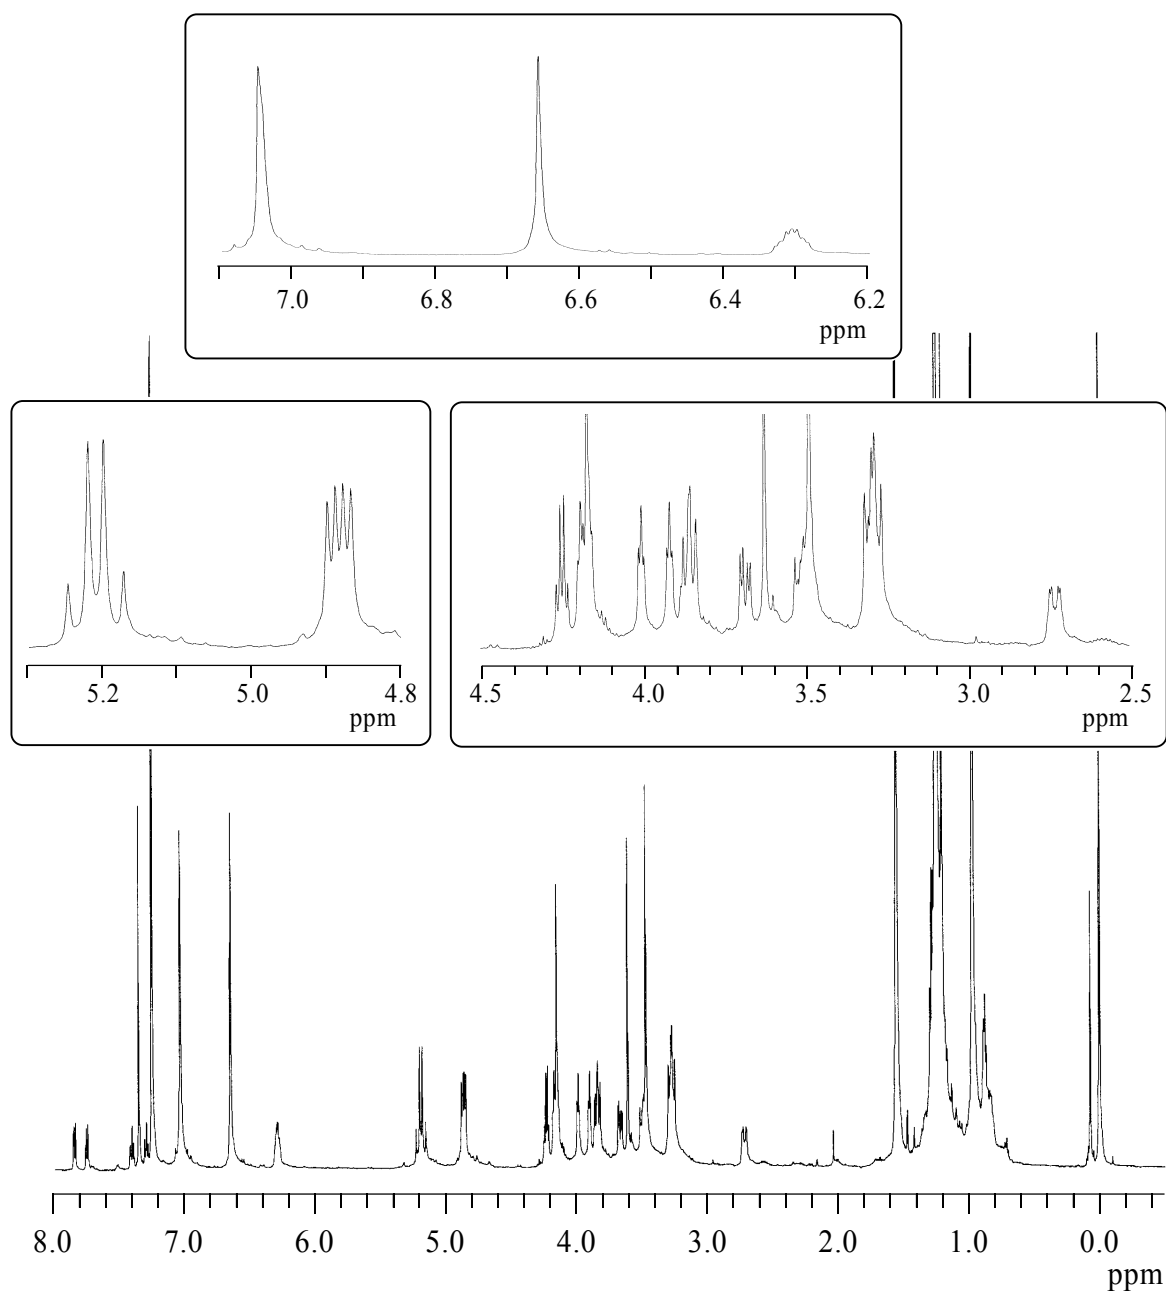

**Fig. S2**  $^1\text{H}$  NMR spectrum at 600 MHz in  $\text{CDCl}_3$  at 25°C of *meso*-1.
